# Supplementary material
Source: Research Square preprint supplement (doi:10.21203/rs.3.rs-10255415/v1)
Supplement: Supplementary file 1 [file 04aee33452bb2df8e16fb5ea.xlsx]

## Sheet: Index
VozConsultAI - Manuscript tables (J.UCS draft v3)
Table 1	Open-weight models included in the benchmark
Table 2	Semantic and Structural Correctness (SSC) by SOAP component
Table 3	Information Coverage and Completeness (ICC) by SOAP component
Table 4	Clinical Grounding Index (CGI) by SOAP component
Table 5	Consolidated Clinical Documentation Quality Index (CDQI)
Source: Deliverable M2.E3.D2 - Comparative report of generative AI providers, VozConsultAI project (TED No. 31/2024). Evaluation over 30 synthetic Brazilian Portuguese teleconsultation transcripts, six specialties.

## Sheet: Table 1
Table 1: Open-weight models included in the benchmark.
Model	Developer (country)	License	Scale	Hardware (indicative)	PT-BR support
gpt-oss-120b	OpenAI (USA)	Apache 2.0	117B MoE (~5.1B active)	1x 80 GB GPU	limited (EN-centric)
Llama 3.3 70B Instruct	Meta (USA)	Llama Community	70B dense	~2x 80 GB GPU	official
Mistral Small	Mistral AI (EU)	Apache 2.0	intermediate	multi-GPU (medium)	yes
Mistral 7B Instruct v0.3	Mistral AI (EU)	Apache 2.0	7B dense	1x consumer GPU	partial
DeepSeek V3.2	DeepSeek (China)	MIT	671B MoE (~37B active)	multi-GPU (large)	partial (validated)
Source: VozConsultAI project, deliverable M2.E3.D2 (2026).

## Sheet: Table 2
Table 2: Semantic and Structural Correctness (SSC) by SOAP component.
Component	gpt-oss-120b	Mistral-7B	Llama 3.3	Mistral Small	DeepSeek V3.2
Subjective	0.62	0.79	0.81	0.65	0.72
Objective	0.93	0.9	0.9	0.89	0.93
Assessment	0.58	0.4	0.47	0.41	0.54
Plan	0.79	0.83	0.8	0.8	0.8
Overall SSC	0.73	0.73	0.75	0.69	0.75
Source: VozConsultAI project, deliverable M2.E3.D2 (2026).

## Sheet: Table 3
Table 3: Information Coverage and Completeness (ICC) by SOAP component.
Component	gpt-oss-120b	Mistral-7B	Llama 3.3	Mistral Small	DeepSeek V3.2
Subjective	0.77	0.28	0.6	0.7	0.86
Objective	0.97	0.62	0.89	0.94	0.96
Assessment	0.81	0.76	0.85	0.79	0.8
Plan	0.81	0.56	0.66	0.72	0.91
Overall ICC	0.84	0.56	0.75	0.79	0.88
Source: VozConsultAI project, deliverable M2.E3.D2 (2026).

## Sheet: Table 4
Table 4: Clinical Grounding Index (CGI) by SOAP component.
Component	gpt-oss-120b	Mistral-7B	Llama 3.3	Mistral Small	DeepSeek V3.2
Subjective	0.91	0.87	0.91	0.91	0.97
Objective	0.99	0.97	0.98	1	1
Assessment	0.86	0.65	0.7	0.62	0.87
Plan	0.91	0.97	0.93	0.95	0.99
Overall CGI	0.92	0.87	0.88	0.87	0.96
Source: VozConsultAI project, deliverable M2.E3.D2 (2026).

## Sheet: Table 5
Table 5: Consolidated Clinical Documentation Quality Index (weights: CGI 4, SSC 3, ICC 3; conservative = minimum dimension).
Model	CDQI (safety-weighted)	CDQI (conservative)
DeepSeek V3.2	0.87	0.75
gpt-oss-120b	0.84	0.73
Llama 3.3 70B	0.8	0.75
Mistral Small	0.79	0.69
Mistral 7B v0.3	0.74	0.56
Source: VozConsultAI project, deliverable M2.E3.D2 (2026). Values computed by formula from Tables 2-4.
